# Supplementary material for: Identification of a novel platelet antagonist that binds to CLEC-2 and suppresses podoplanin-induced platelet aggregation and cancer metastasis
Source: PubMed Central journal article supplement (PMC4767466; doi:10.18632/oncotarget.5811), 2015-10-30
Supplement: oncotarget-06-42733-s001.pdf [file oncotarget-06-42733-s001.pdf]

## SUPPLEMENTARY METHODS

### Synthesis and characterization of 2CP

2CP was synthesized as outlined in the Supplementary Figure S1. Chloro-4-nitro-2-(trifluoromethyl) benzene (13.3 mmole) was dissolved in dimethyl sulfoxide (12 mL), and then sodium hydroxide (40 mmole) was slowly added at a temperature lower than 25 °C. The reaction mixture was stirred at room temperature for 8 h, and then 1 N HCl solution was added to adjust the pH values to 1~2. The solution was partitioned between dichloromethane and water, and the organic layer was evaporated at reduced pressure to yield residues. The residues were subjected to purification on a silica gel column (50 g) and eluted with  $\text{CHCl}_3/n$ -hexane (2:1) to yield 4-nitro-2-(trifluoromethyl) phenol (1.85 g). 4-Nitro-2-(trifluoromethyl) phenol (500 mg, 2.4 mmole) and *tert*-butyl 2-aminoethylcarbamate (769 mg, 4.8 mmole) which were dissolved in 1 M aqueous NaOH solution (7.2 mmole) and dioxane (10 mL) and stirred at 100 °C for 24 h. 1 N HCl solution was added to adjust the pH value to 1~2, and then extracted with  $\text{CH}_2\text{Cl}_2$ , five times (each for 20 ml). The obtained  $\text{CH}_2\text{Cl}_2$  solution was hydrated over  $\text{MgSO}_4$  and concentrated under vacuum. The organic layer was evaporated at reduced pressure, and subjected to a silica gel column (50 g) and eluted with the system of  $\text{CHCl}_3/n$ -hexane (19:1) to afford *tert*-butyl

2-(2-hydroxy-5-nitrobenzamido) ethylcarbamate (600 mg). *tert*-Butyl 2-(2-hydroxy-5-nitrobenzamido) ethylcarbamate was deprotected in 20% trifluoroacetic acid (TFA) solution (TFA:DCM = 1:4) at room temperature for 2 h, and was purified on a silica gel column and eluted using the system of  $\text{CHCl}_3/n$ -hexane (4:1) to give *N*-(2-aminoethyl)-2-hydroxy-5-nitrobenzamide (390 mg). *N*-(2-aminoethyl)-2-hydroxy-5-nitrobenzamide (390 mg) was dissolved in 2 N NaOH (10 ml) and reacted with benzoyl chloride at room temperature for 16 h. The mixture was then concentrated under vacuum. The residue was subjected to purification on a silica gel column and eluted using the system of  $\text{CHCl}_3/n$ -hexane (30:1) to afford 2CP (325 mg).  $^1\text{H}$  NMR (400 MHz, acetone-*d*<sub>6</sub>):  $\delta$  9.12 (1H, *s*, NH), 8.76 (1H, *d*,  $J = 2.4$  Hz, H-2), 8.29 (1H, *dd*,  $J = 2.4, 9.2$  Hz, H-4), 8.17 (1H, *s*, NH), 7.90 (2H, *d*,  $J = 7.2$  Hz, H-8, 12), 7.51 (1H, *t*,  $J = 7.2$  Hz, H-10), 7.44 (2H, *t*,  $J = 7.2$  Hz, H-9, 11), 8.29 (1H, *d*,  $J = 9.2$  Hz, H-5), 3.70 (4H, *t*,  $J = 2.8$  Hz, H-14, 15).  $^{13}\text{C}$  NMR (acetone-*d*<sub>6</sub>, 100 MHz)  $\delta$ : 170.4 (*s*, C=O, C-16), 168.6 (*s*, C=O, C-13), 168.3 (*s*, C-6), 140.7 (*s*, C-3), 135.9 (*s*, C-7), 132.4 (*s*, C-10), 130.1 (*s*, C-4), 129.5 (*s*, C-9, 11), 128.4 (*s*, C-8, 12), 124.7 (*s*, C-2), 119.9 (*s*, C-5), 115.4 (*s*, C-1), 41.5, 40.2 (*s*, C-14, 15). ESI-MS  $m/z$  330 (100)  $[\text{M}+\text{H}]^+$ , 352 (32)  $[\text{M}+\text{Na}]^+$ . HRESI-MS  $m/z$  352.0911 (calc.: 352.0909;  $\text{C}_{16}\text{H}_{15}\text{N}_3\text{O}_5\text{Na}$ ).

## SUPPLEMENTARY FIGURES AND TABLE

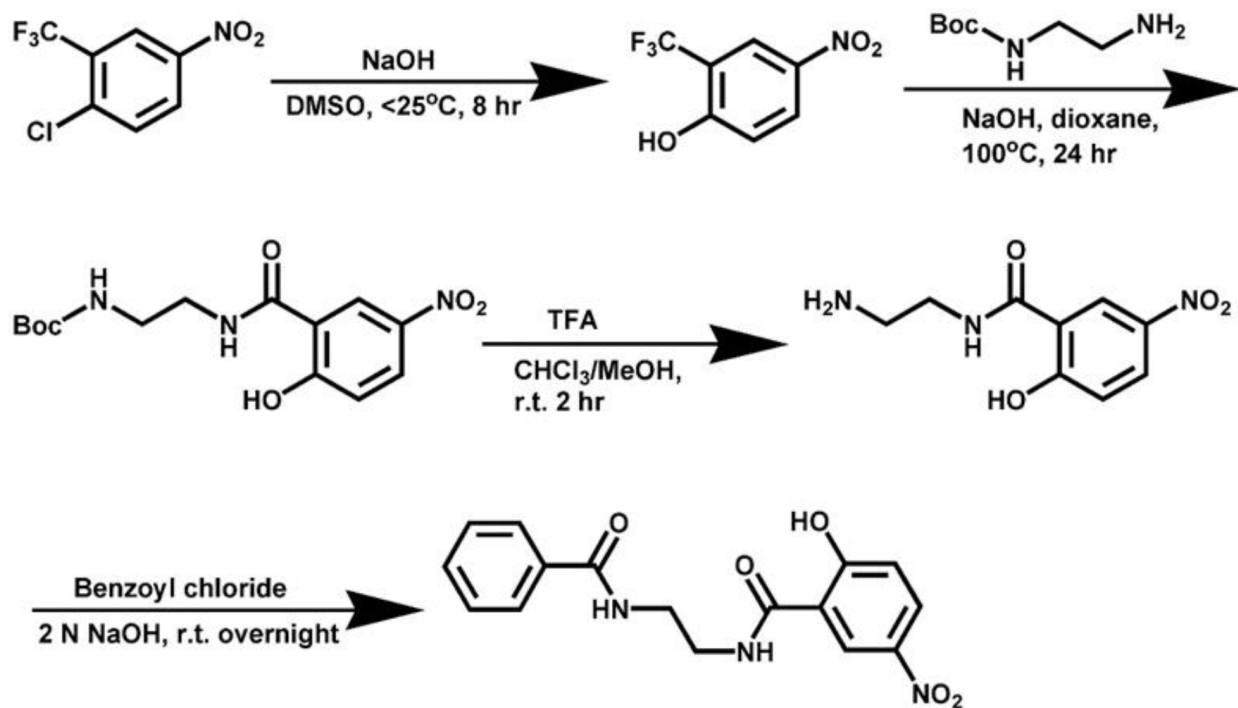

**Supplementary Figure S1: The chemical reaction for the synthesis of 2CP.** The detailed procedures for synthesis of 2CP were described in the supplementary methods.

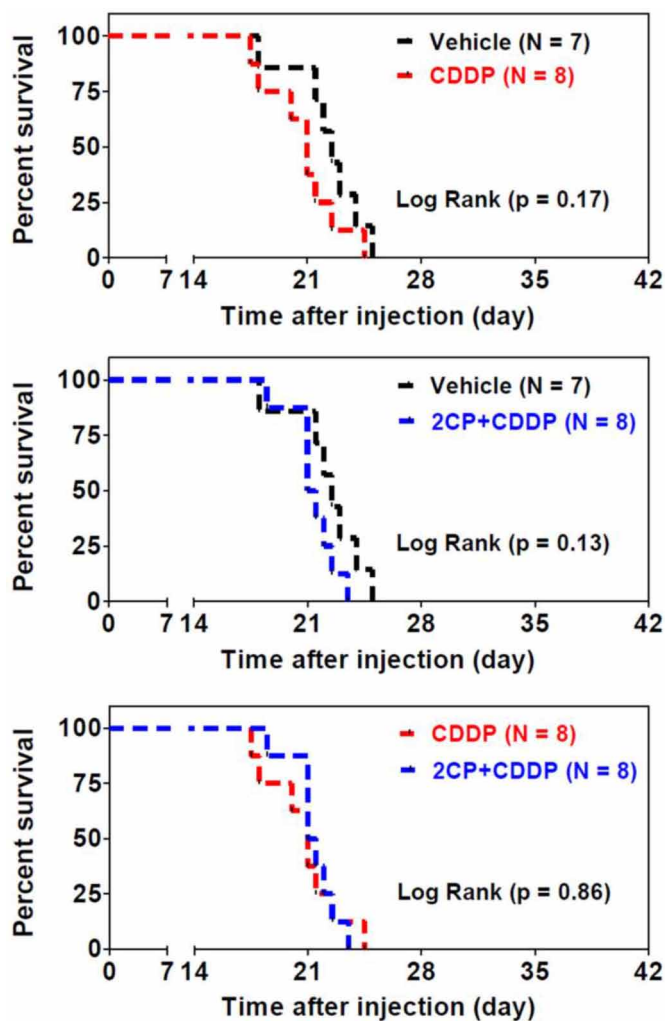

**Supplementary Figure S2: 2CP does not prolong the survival of animals injected with PDPN-deficient C6/LG cells.** The nude mice were intravenously injected with the C6/LG cells ( $1.5 \times 10^5$ ) followed by the treatment of CDDP ( $n = 8$ ), 2CP + CDDP ( $n = 8$ ), or vehicle control ( $n = 7$ ) as described in the Materials and Methods. The survival time of the animals was recorded and analyzed using the Kaplan-Meier survival curve and the log rank test.

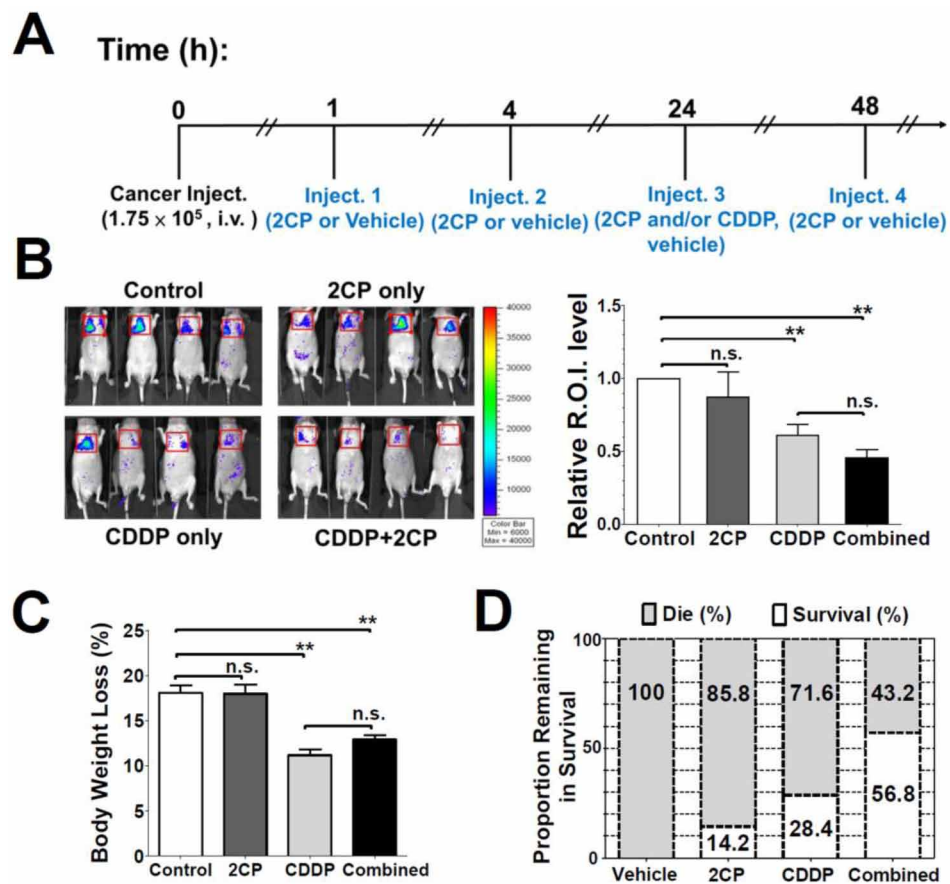

**Supplementary Figure S3: The effect of post-treatment of 2CP on mouse pulmonary metastases and animal survival.**

**A.** Timeline for the experimental protocols of the mouse pulmonary metastases model. The post-administration schedule of 2CP and the therapeutic efficacy were analyzed at the indicated time points as described in the “Materials and Methods”. **B.** The mice intravenously injected with C6/Lung cells ( $1.75 \times 10^5$  cells) were subject to the indicated treatment of vehicle control, 2CP (3.5 mg/kg), CDDP (2.5 mg/kg), and 2CP + CDDP, respectively. Representative bioluminescence images for tumor formation were shown (left panel) and quantified (right panel). **C.** The body weight recorded at day 21 after tumor inoculation was used to calculate the percentage of the body weight loss. Data represent the mean  $\pm$  S.E. of seven mice.  $**P < 0.01$  when compared with the control treatment. n.s., no significance. **D.** The data show the percentage of animal survival at Day 40 after the initiation of experiments.

**Supplementary Table S1: Effect of 2CP on selected protein kinase activity**

| <b>Kinases</b>              | <b>Kinase activity (% control)<sup>a</sup></b> |
|-----------------------------|------------------------------------------------|
| CaMKI                       | 92                                             |
| CaMKII $\beta$              | 98                                             |
| cSrc                        | 98                                             |
| FAK                         | 86                                             |
| Fyn                         | 109                                            |
| Hck                         | 97                                             |
| Lyn                         | 93                                             |
| PDK1                        | 104                                            |
| PKB $\alpha$                | 103                                            |
| PKB $\beta$                 | 110                                            |
| PKC $\delta$                | 100                                            |
| Syk                         | 95                                             |
| Yes                         | 91                                             |
| ZAP-70                      | 90                                             |
| PI3 Kinase (p110 $\alpha$ ) | 100                                            |
| PI3 Kinase (p110 $\beta$ )  | 99                                             |
| PI3 Kinase (p120 $\gamma$ ) | 92                                             |

<sup>a</sup>The effect of 2CP (50  $\mu$ M) on the selected protein kinase activities was analyzed using the Millipore Kinase Profiler service (Radiometric filter binding assay). The data represent the mean of replicate assays.
